# Supplementary material for: Association between breast and endometrial cancer: a two-way Mendelian randomization study
Source: Research Square preprint supplement (doi:10.21203/rs.3.rs-3790043/v1), 2023-12-29

**Table S1.** **The detailed information of removed SNPs.**

|  | **Exposure** | **Outcome** | **SNP** | **EA** | **OA** | **Reasons for exclusion** |
| --- | --- | --- | --- | --- | --- | --- |
| 1 | Endometrial cancer | Breast cancer | rs9668337 | A | G | the SNP not found in breast cancer GWAS |
| 2 | Endometrial cancer | Breast cancer | rs3184504 | C | T | the SNP not found in breast cancer GWAS |
| 3 | Endometrial cancer | Breast cancer | rs4767257 | T | C | the SNP not found in breast cancer GWAS |
| 4 | Endometrial cancer | Breast cancer | rs10089519 | G | A | the SNP is an outlier by MR-PRESSO analysis |
| 5 | Endometrial cancer | ER+ breast cancer | rs9668337 | A | G | the SNP not found in breast cancer GWAS |
| 6 | Endometrial cancer | ER+ breast cancer | rs3184504 | C | T | the SNP not found in breast cancer GWAS |
| 7 | Endometrial cancer | ER+ breast cancer | rs4767257 | T | C | the SNP not found in breast cancer GWAS |
| 8 | Endometrial cancer | ER- breast cancer | rs9668337 | A | G | the SNP not found in breast cancer GWAS |
| 9 | Endometrial cancer | ER- breast cancer | rs3184504 | C | T | the SNP not found in breast cancer GWAS |
| 10 | Endometrial cancer | ER- breast cancer | rs4767257 | T | C | the SNP not found in breast cancer GWAS |
| 11 | Endometrial cancer | ER- breast cancer | rs10089519 | G | A | the SNP is an outlier by MR-PRESSO analysis |
| 12 | Endometrial cancer | ER- breast cancer | rs7981863 | T | C | the SNP is an outlier by MR-PRESSO analysis |
| 13 | Breast cancer | Endometrial cancer | rs56891541 | TCC | T | the SNP not found in endometrial cancer GWAS |
| 14 | Breast cancer | Endometrial cancer | rs11571833 | T | A | the SNP not found in endometrial cancer GWAS |
| 15 | Breast cancer | Endometrial cancer | rs62237573 | T | C | the SNP not found in endometrial cancer GWAS |
| 16 | Breast cancer | Endometrial cancer | rs418053 | C | G | palindromic SNP |
| 17 | Breast cancer | Endometrial cancer | rs9284657 | G | C | palindromic SNP |
| 18 | Breast cancer | Endometrial cancer | rs10054203 | C | G | the SNP is an outlier by MR-PRESSO analysis |
| 19 | Breast cancer | Endometrial cancer | rs10623258 | CTT | C | the SNP is an outlier by MR-PRESSO analysis |
| 20 | Breast cancer | Endometrial cancer | rs2853669 | G | A | the SNP is an outlier by MR-PRESSO analysis |
| 21 | Breast cancer | Endometrial cancer | rs67087079 | A | G | the SNP is an outlier by MR-PRESSO analysis |
| 22 | Breast cancer | Endometrial cancer | rs71557345 | A | G | the SNP is an outlier by MR-PRESSO analysis |
| 23 | ER+ breast cancer | Endometrial cancer | rs35353761 | G | A | the SNP not found in endometrial cancer GWAS |
| 24 | ER+ breast cancer | Endometrial cancer | rs56891541 | TCC | T | the SNP not found in endometrial cancer GWAS |
| 25 | ER+ breast cancer | Endometrial cancer | rs11571818 | C | T | the SNP not found in endometrial cancer GWAS |
| 26 | ER+ breast cancer | Endometrial cancer | rs62237573 | T | C | the SNP not found in endometrial cancer GWAS |
| 27 | ER+ breast cancer | Endometrial cancer | rs2735846 | G | C | palindromic SNP |
| 28 | ER+ breast cancer | Endometrial cancer | rs418053 | C | G | palindromic SNP |
| 29 | ER+ breast cancer | Endometrial cancer | rs4752569 | T | A | palindromic SNP |
| 30 | ER+ breast cancer | Endometrial cancer | rs688601 | A | T | palindromic SNP |
| 31 | ER+ breast cancer | Endometrial cancer | rs2403907 | A | C | the SNP is an outlier by MR-PRESSO analysis |
| 32 | ER+ breast cancer | Endometrial cancer | rs3217992 | T | C | the SNP is an outlier by MR-PRESSO analysis |
| 33 | ER+ breast cancer | Endometrial cancer | rs34196306 | C | G | the SNP is an outlier by MR-PRESSO analysis |
| 34 | ER+ breast cancer | Endometrial cancer | rs4076654 | T | A | the SNP is an outlier by MR-PRESSO analysis |
| 35 | ER- breast cancer | Endometrial cancer | rs11571833 | T | A | the SNP not found in endometrial cancer GWAS |
| 36 | ER- breast cancer | Endometrial cancer | rs191981806 | C | T | the SNP not found in endometrial cancer GWAS |
| 37 | ER- breast cancer | Endometrial cancer | rs62116991 | C | G | palindromic SNP |
| 38 | ER- breast cancer | Endometrial cancer | rs2735846 | G | C | palindromic SNP |
| 39 | ER- breast cancer | Endometrial cancer | rs4143044 | G | T | the SNP is an outlier by MR-PRESSO analysis |
| 40 | ER- breast cancer | Endometrial cancer | rs55872725 | T | C | the SNP is an outlier by MR-PRESSO analysis |

SNP: single nucleotide polymorphism; EA: effect allele; OA: other allele; GWAS: Genome-Wide Association Studies.

**Figure S1** Scatter plot: SNP-outcome associations are plotted against the SNP-exposure associations to provide the effect estimate for each individual variant. The lines with different colors represent the regression slope fitted by different MR methods. (A) The causality of endometrial cancer on breast cancer. (B) The causality of endometrial cancer on ER+ breast cancer. (C) The causality of endometrial cancer on ER- breast cancer.


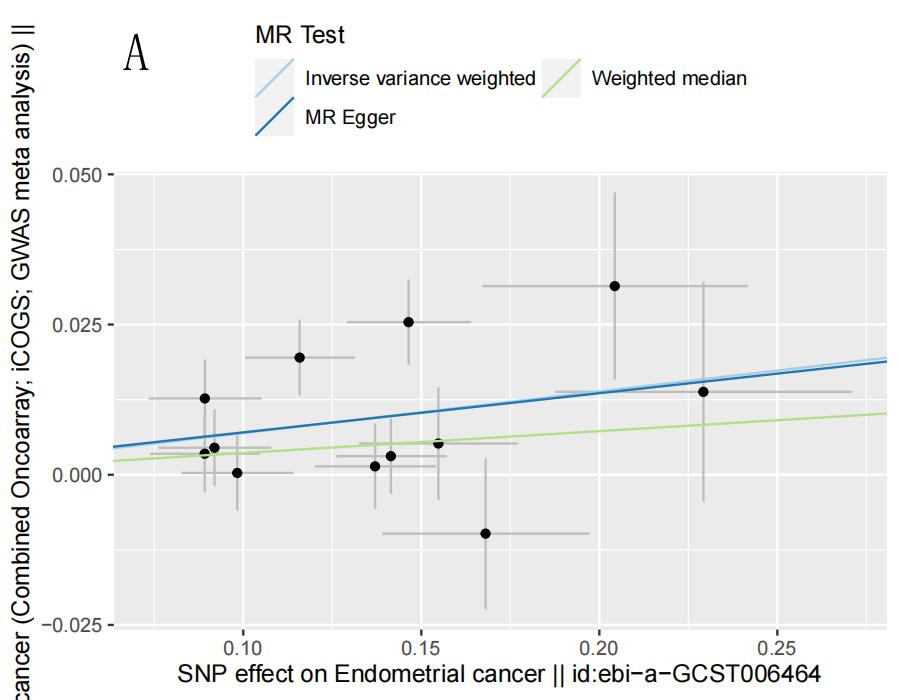


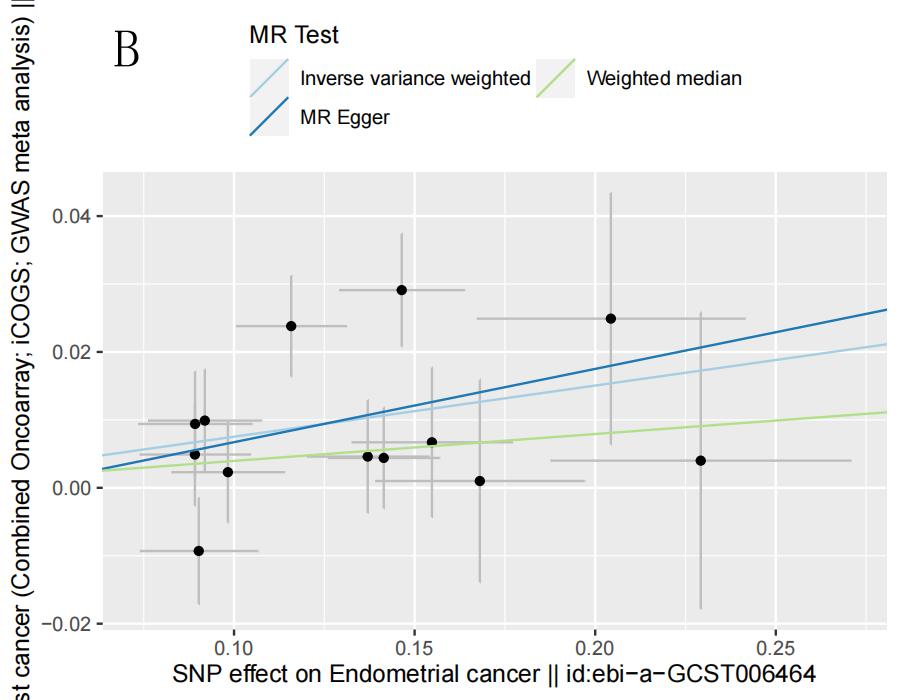


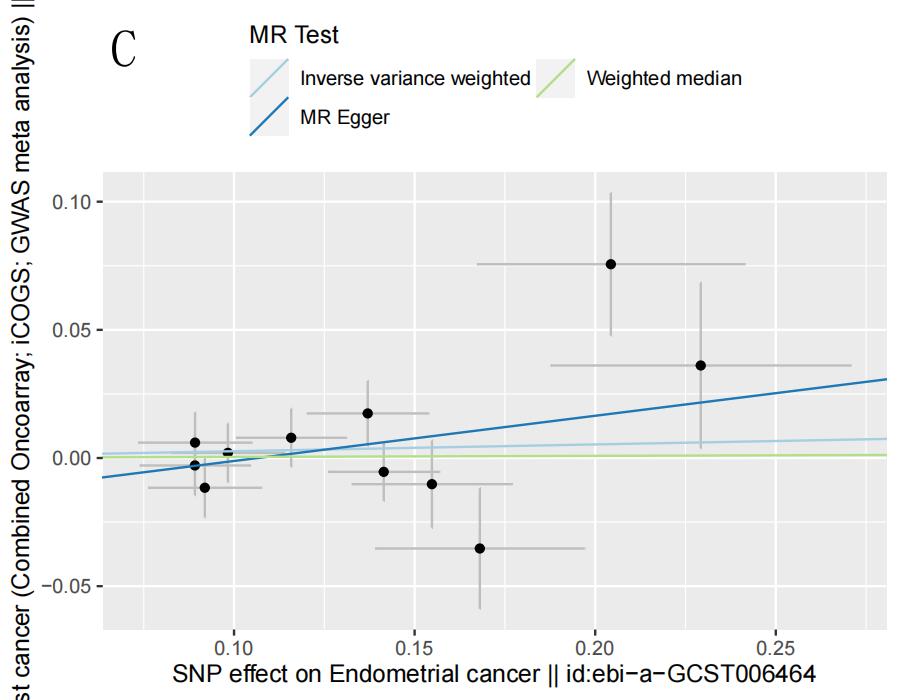


**Figure S2** The leave-one-out analysis; The effect estimates is re-calculated after removal of each SNP to identify if a single SNP is driving the association. (A) Leave-one-out of the effect of endometrial cancer on breast cancer. (B) Leave-one-out of the effect of endometrial cancer on ER+ breast cancer. (C) Leave-one-out of the effect of endometrial cancer on ER- breast cancer.


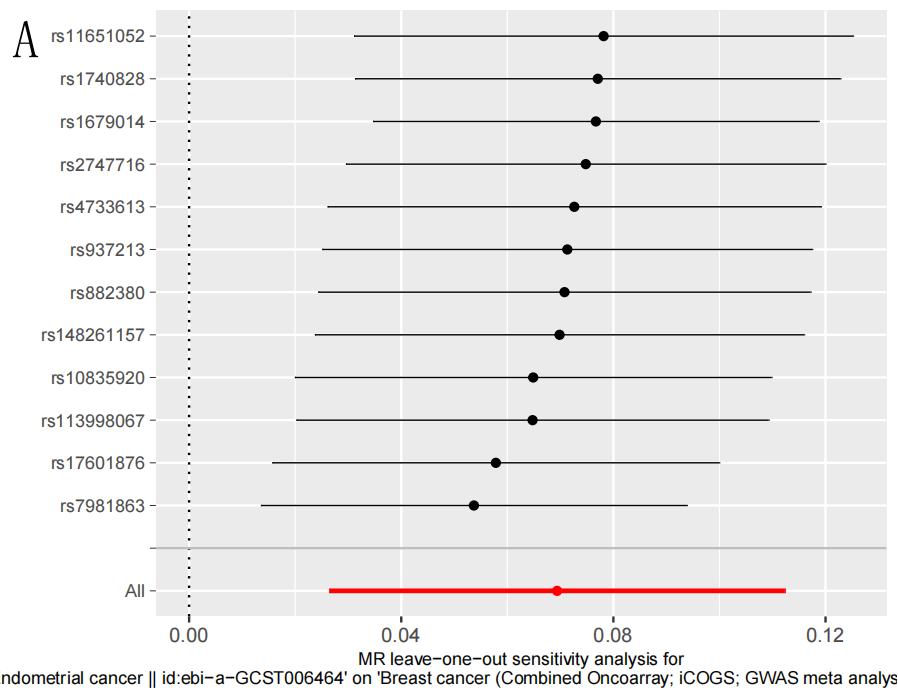


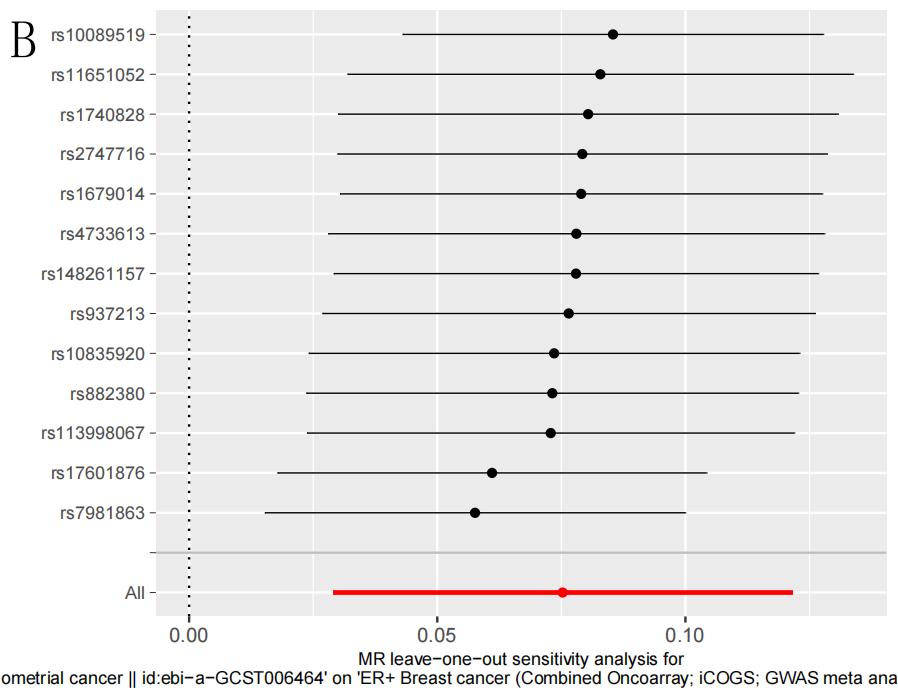


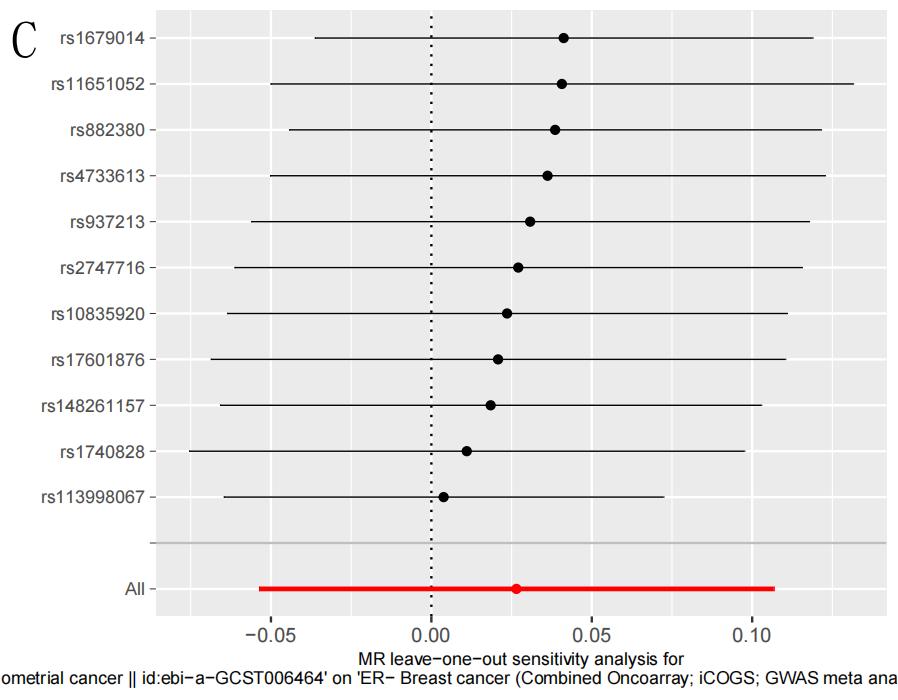


**Figure S3** Funnel plot: the estimates are plotted against the precision of the estimates to test for potential asymmetry. (A) Endometrial cancer and Breast cancer; (B) Endometrial cancer and ER+ breast cancer; (C) Endometrial cancer and ER- breast cancer.


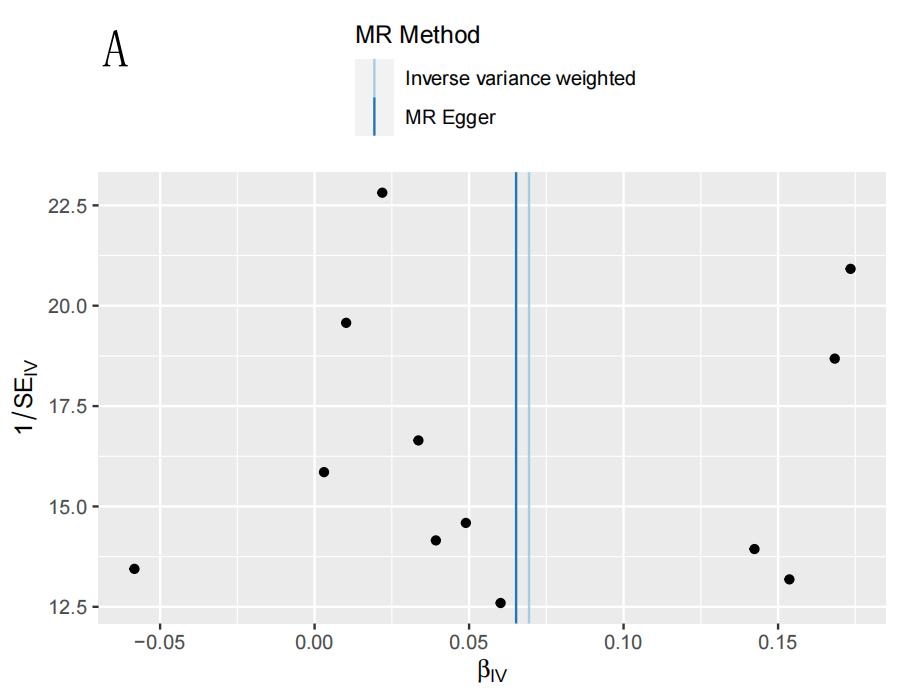


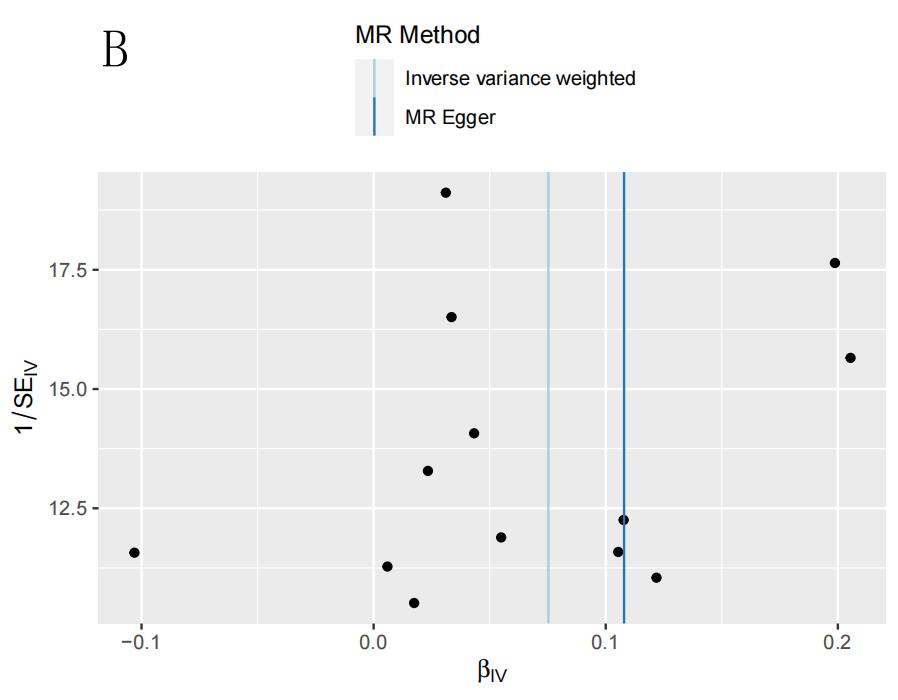


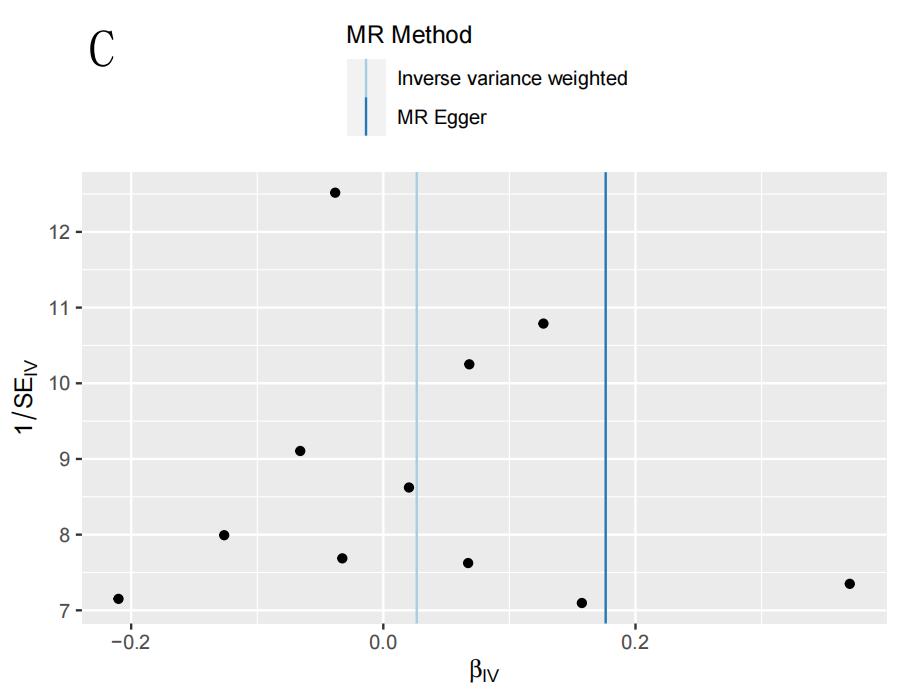


**Figure S4** Scatter plot of the causality of breast cancer on endometrial cancer. (A) Scatter plot of the causality of breast cancer on endometrial cancer. (B) Scatter plot of the causality of ER+ breast cancer on endometrial cancer. (C) Scatter plot of the causality of ER- breast cancer on endometrial cancer.


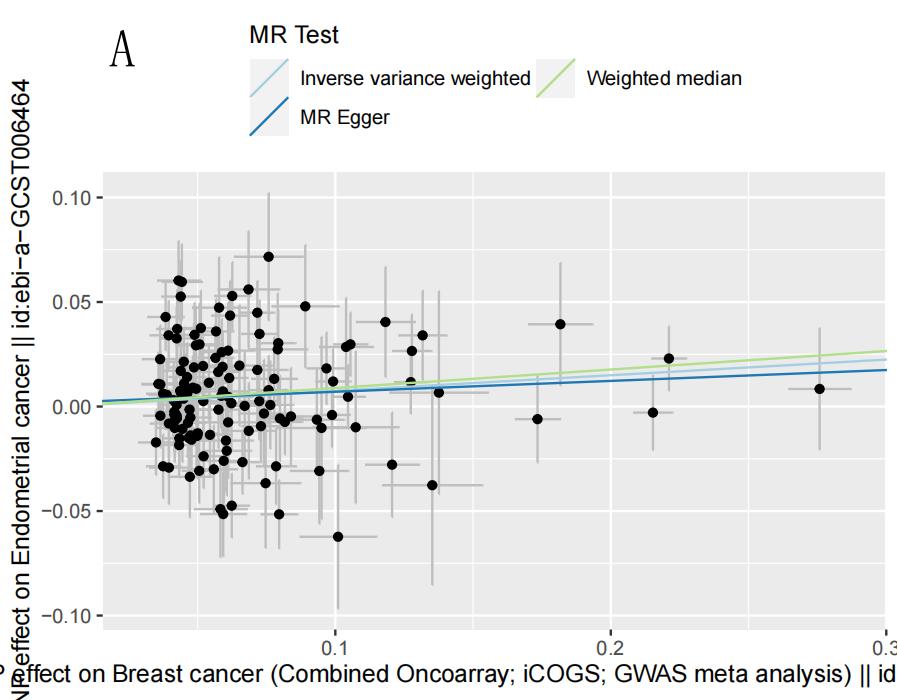


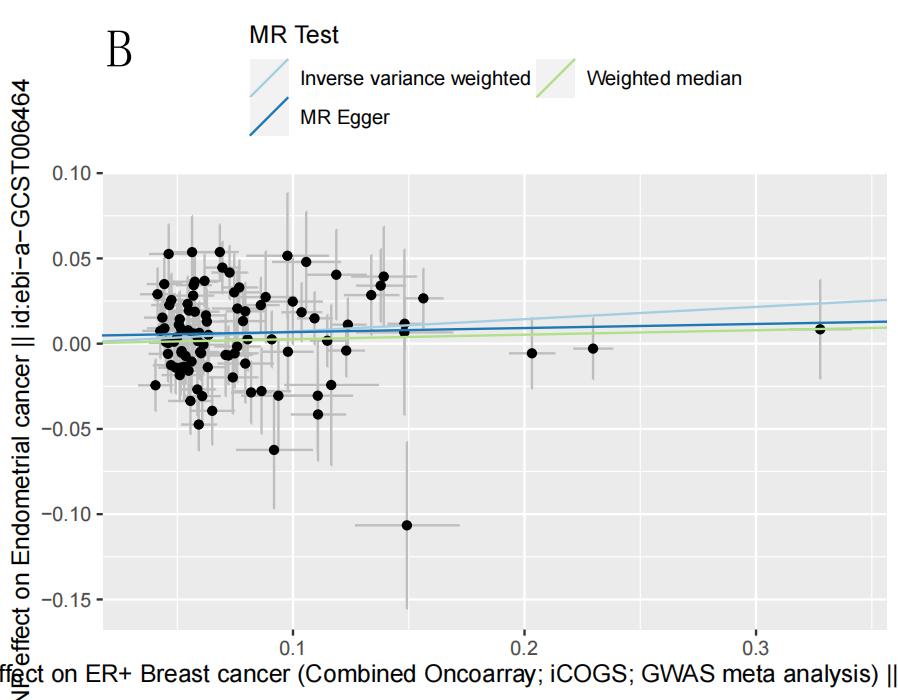


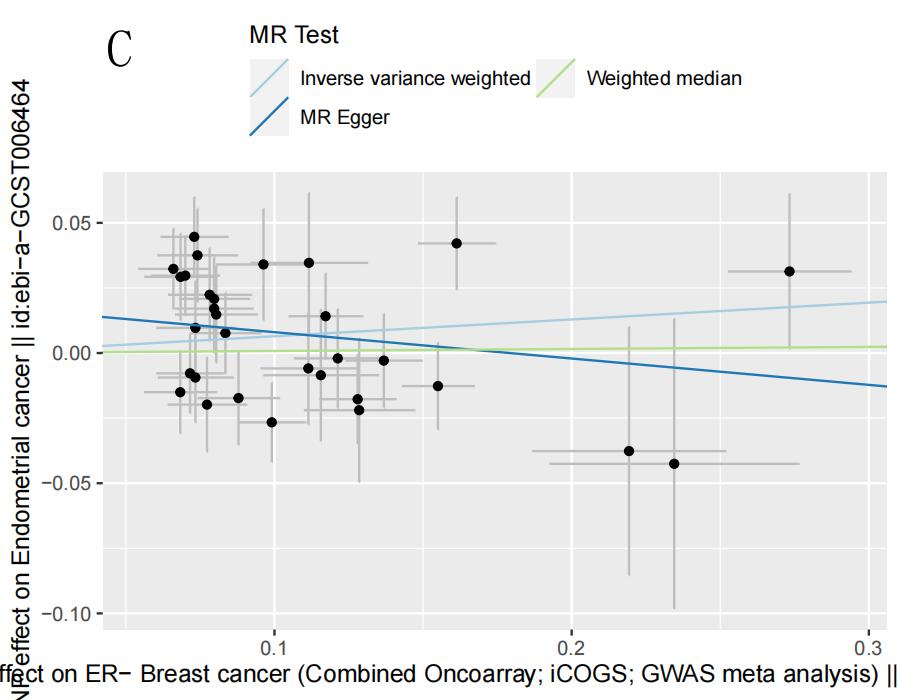


**Figure S5** Leave-one-out of the effect of breast cancer on endometrial cancer. (A) Leave-one-out of the effect of breast cancer on endometrial cancer. (B) Leave-one-out of the effect of ER+ breast cancer on endometrial cancer. (C) Leave-one-out of the effect of ER- breast cancer on endometrial cancer.


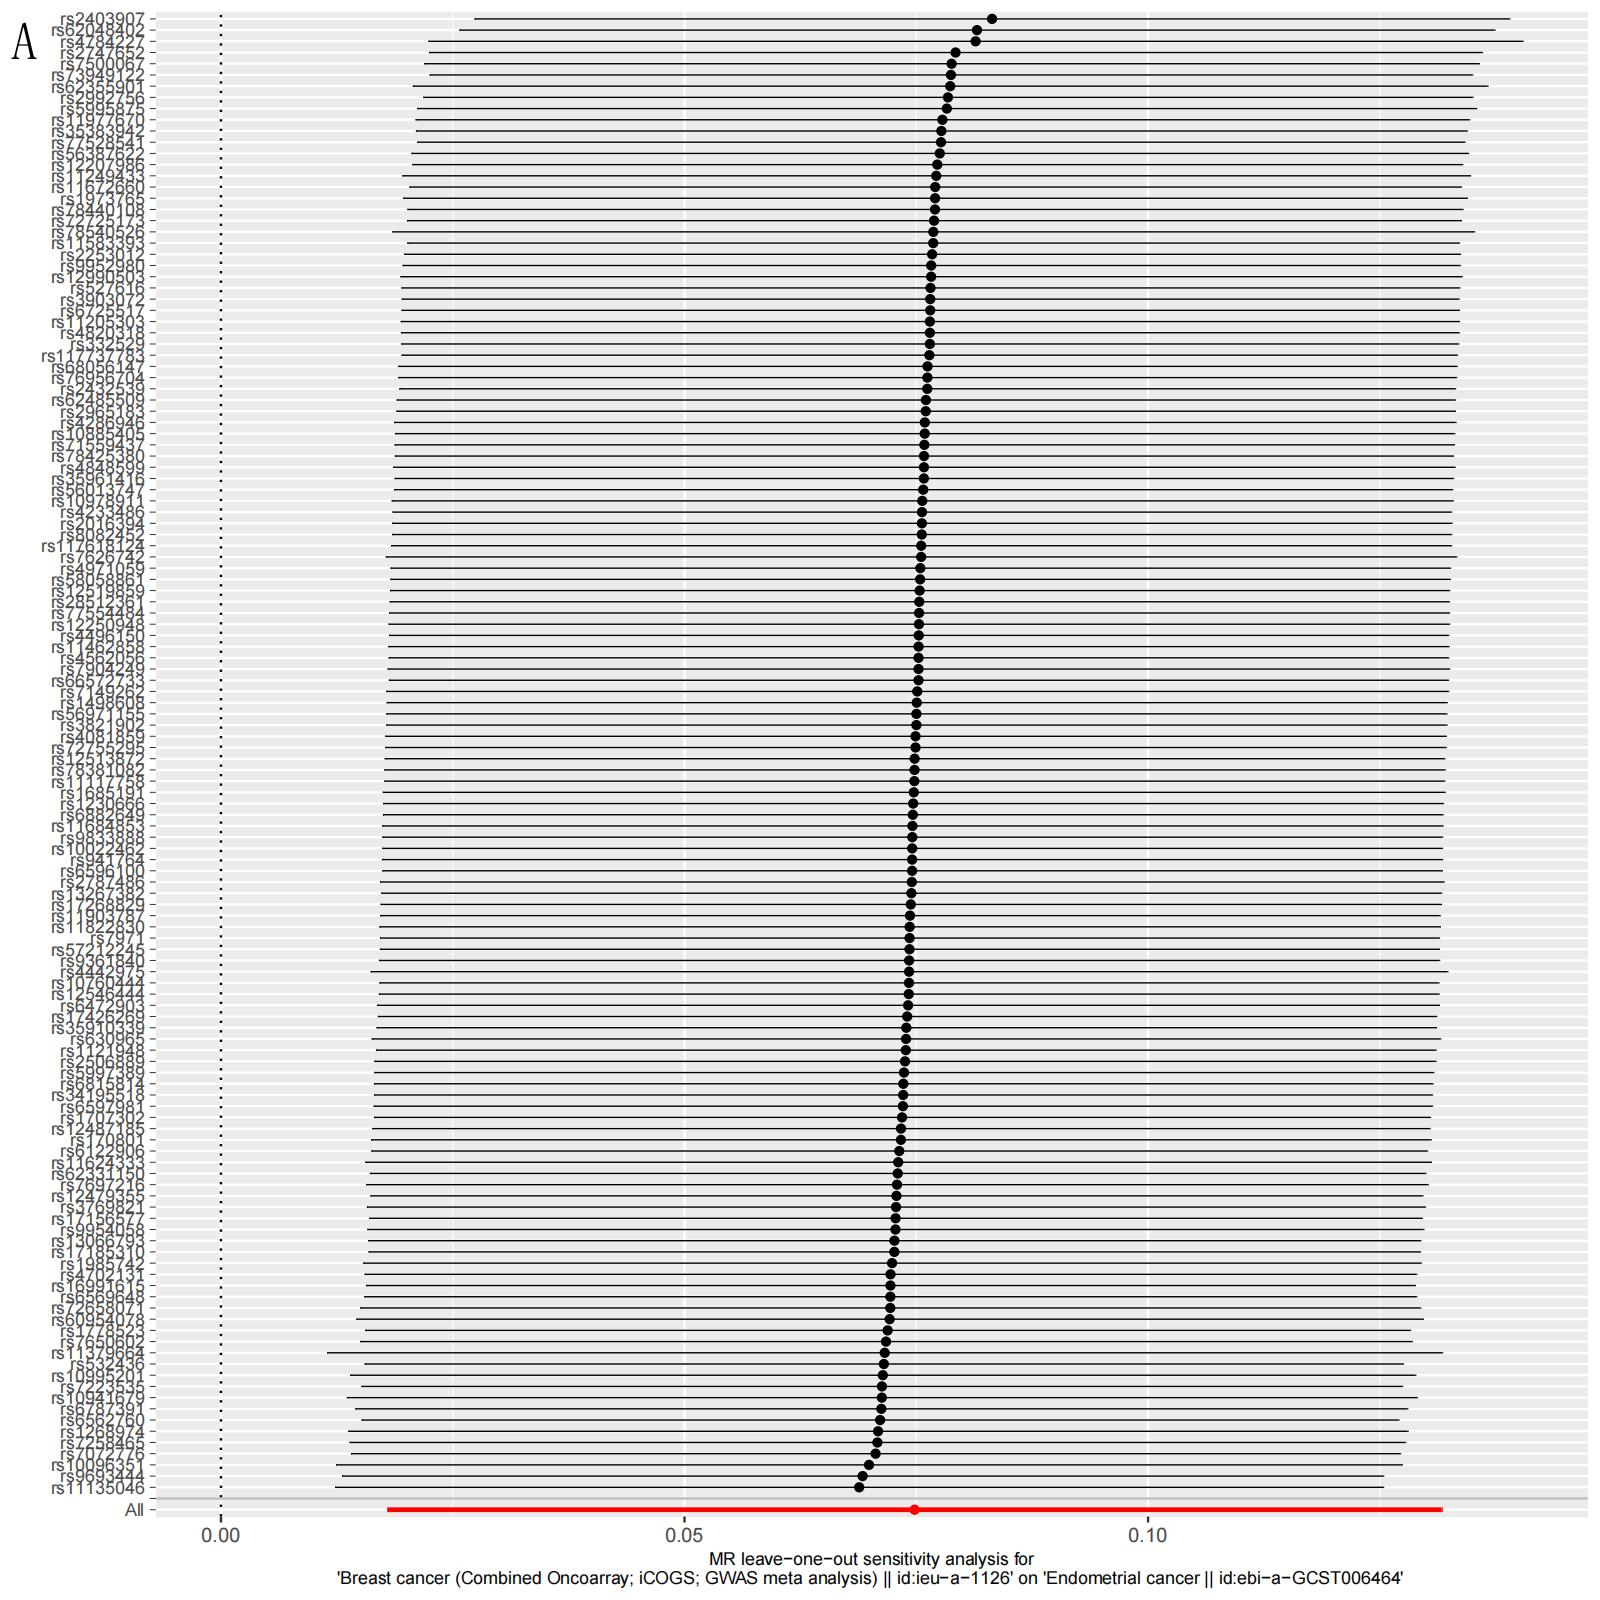


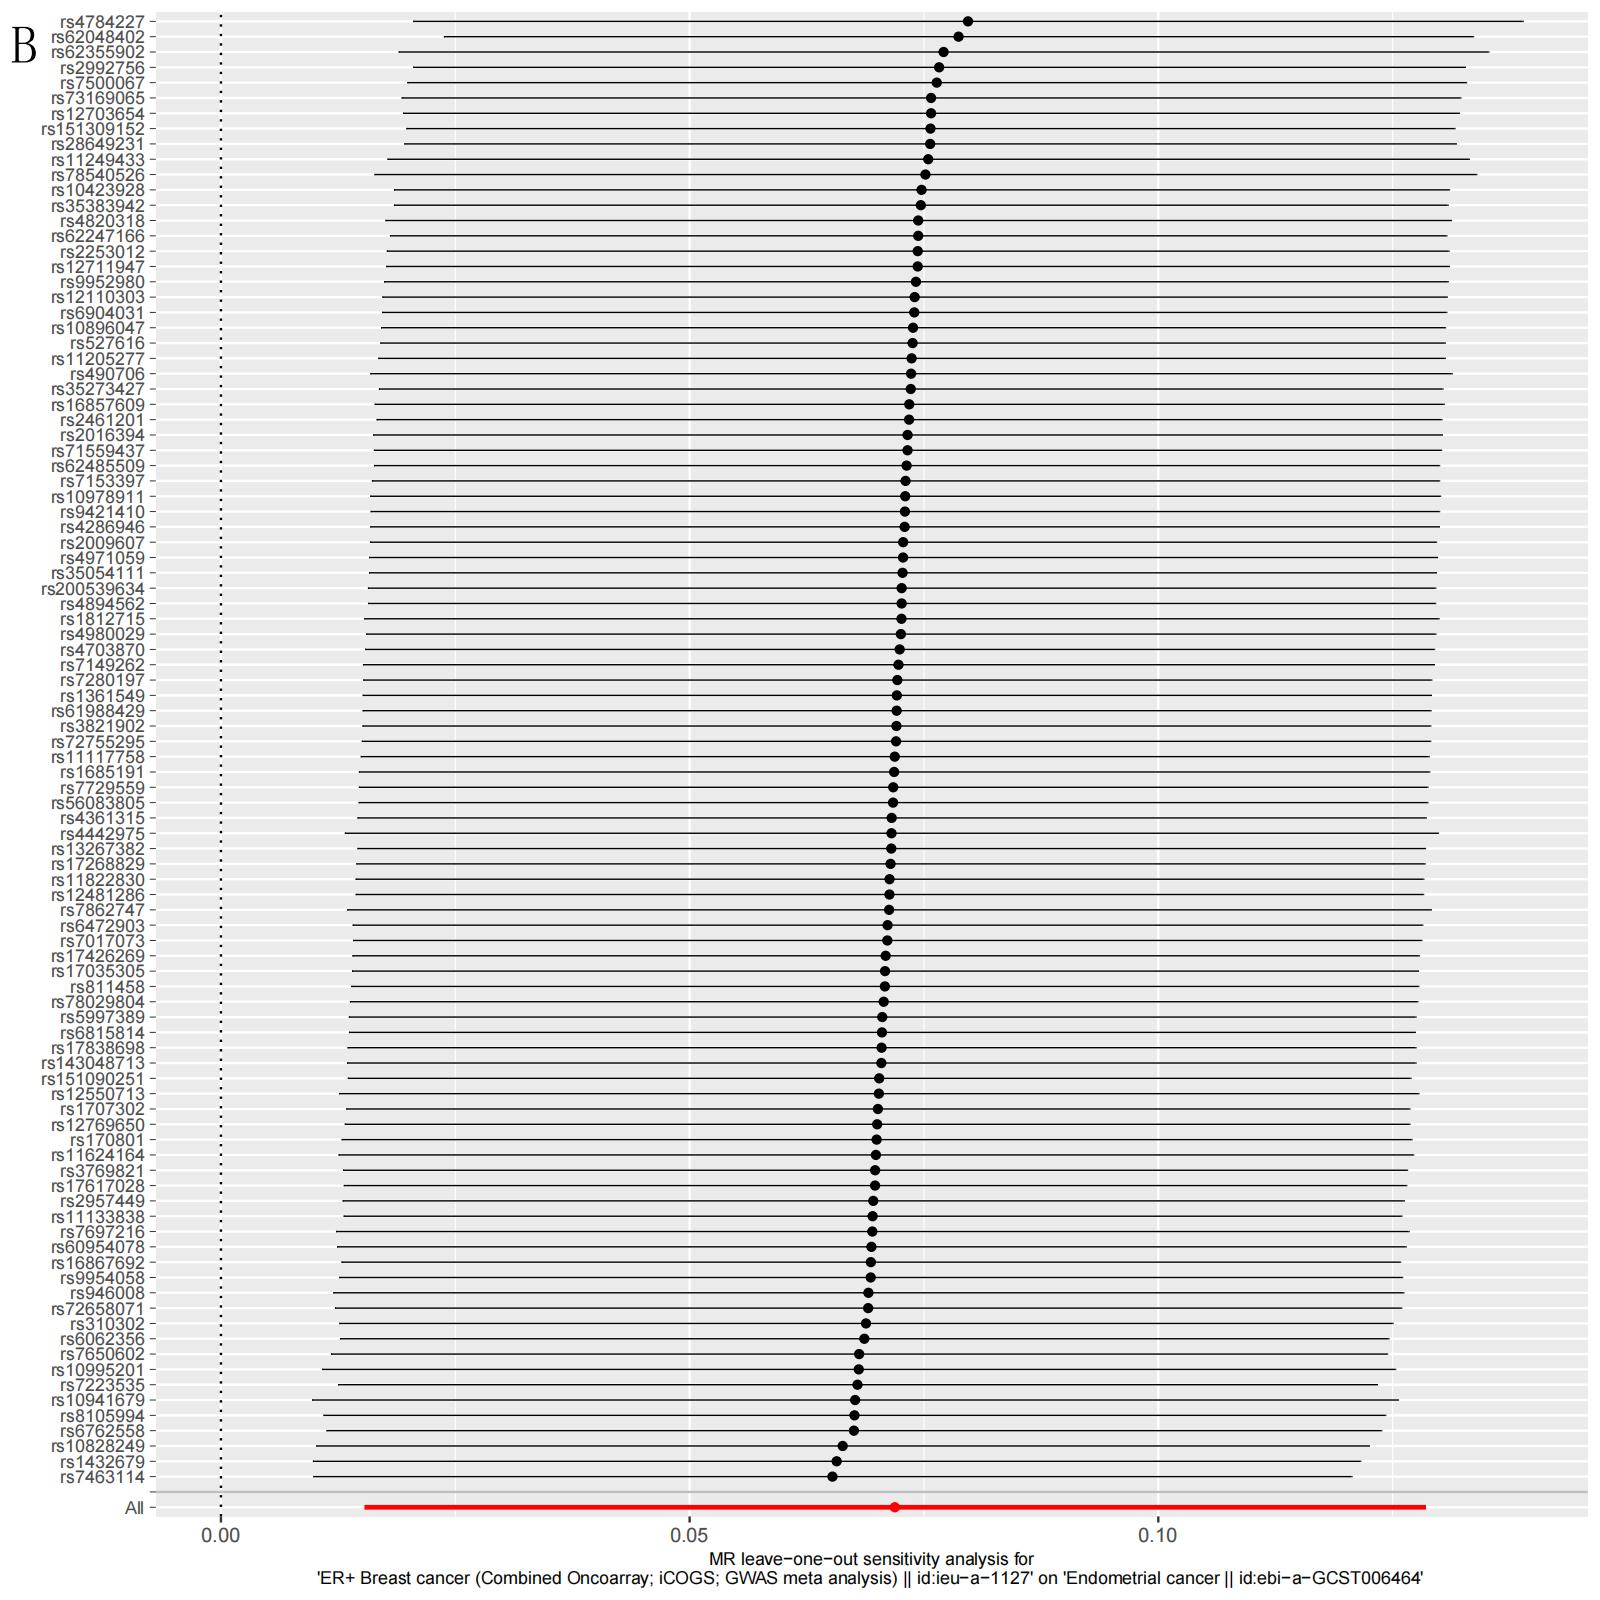


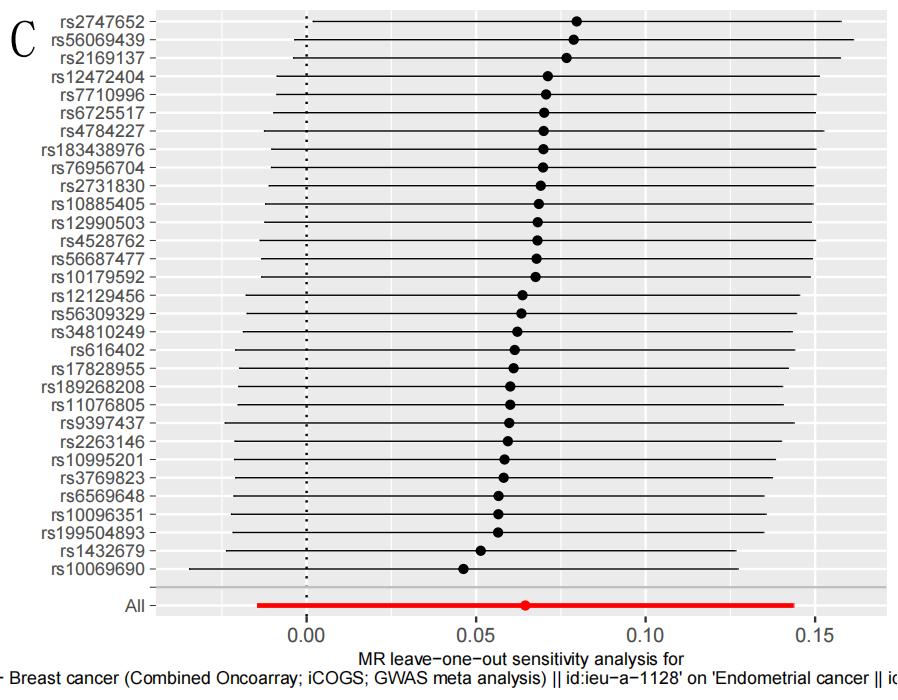


**Figure S6** Funnel plot in the Mendelian randomization analysis of breast cancer and endometrial cancer. (A) Breast cancer and Endometrial cancer; (B) ER+ breast cancer and Endometrial cancer; (C) ER- breast cancer and Endometrial cancer.


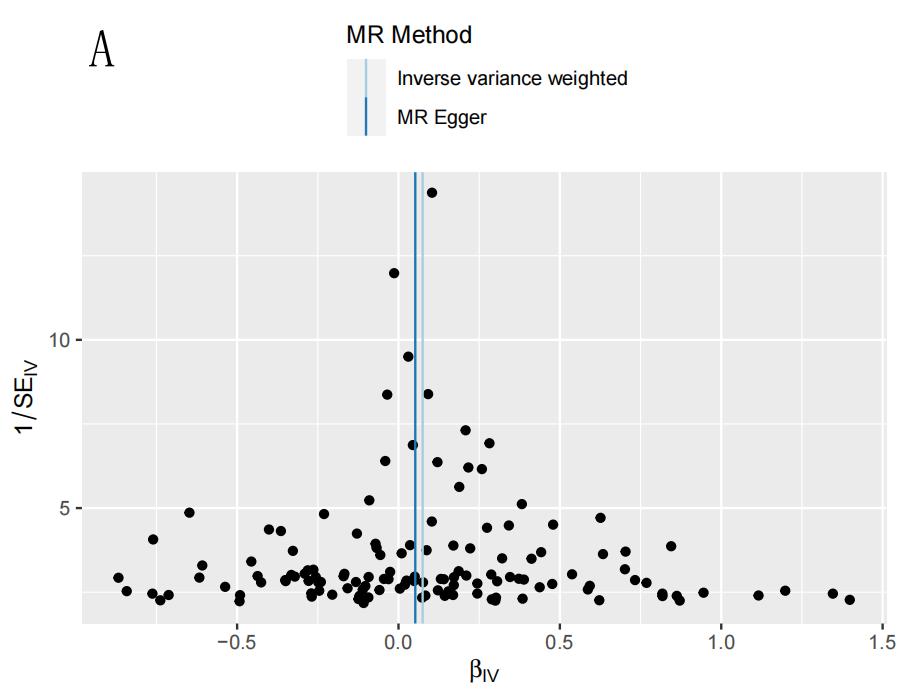


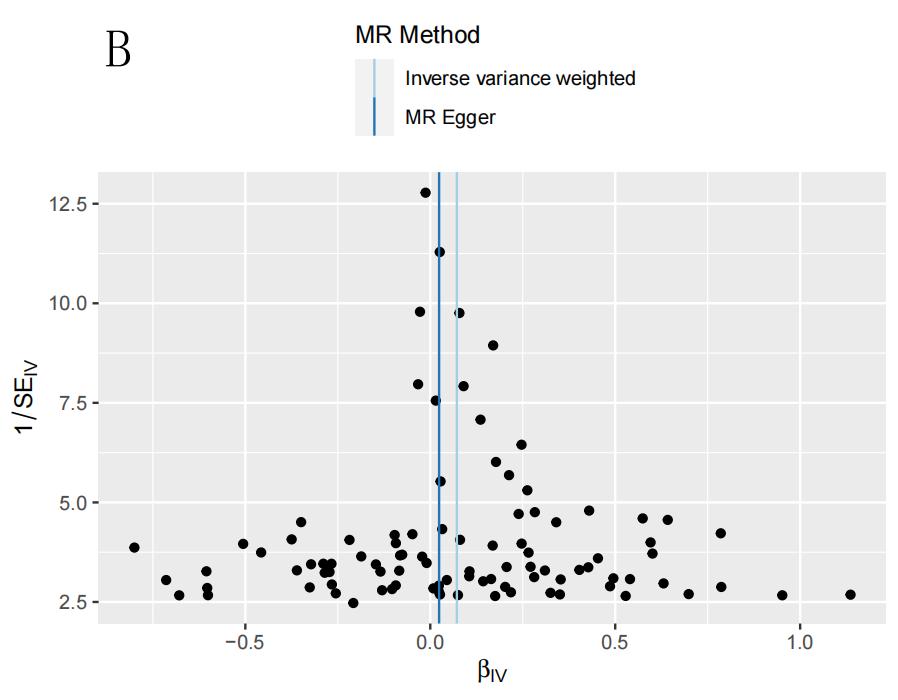


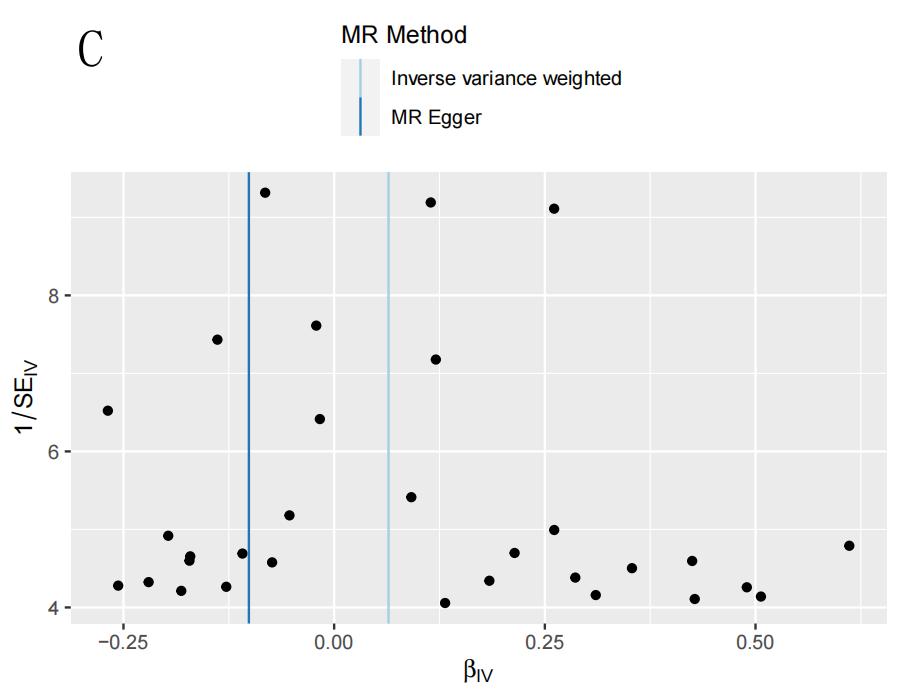

Supplement: Supplementary file 1 [file 2a8be594303494794d488775.docx]
