# Supplementary material for: Association between breast and endometrial cancer: a two-way Mendelian randomization study
Source: Research Square preprint supplement (doi:10.21203/rs.3.rs-3790043/v1), 2023-12-29
Supplement: Supplementary file 2 [file 6cc86af2e9997f88330ca63c.xlsx]

## Sheet: Sheet S1
Sheet S1 SNPs used as genetic instruments for each studied phenotype.
Exposure	SNP	EA	OA	EAF	BETA	SE	P	R2	F	N
Endometrial cancer	rs10089519	G	A	0.6668	0.0902	0.0163	3.02e-08	0.000251176	30.6218	121885
Endometrial cancer	rs10835920	T	C	0.3647	0.0892	0.0157	1.33e-08	0.000264768	32.2792	121885
Endometrial cancer	rs113998067	C	T	0.0482	0.2043	0.0371	3.58e-08	0.000248731	30.3237	121885
Endometrial cancer	rs11651052	G	A	0.5476	0.1415	0.0154	4e-20	0.000692182	84.4237	121885
Endometrial cancer	rs148261157	A	G	0.0404	0.2292	0.0415	3.39e-08	0.000250192	30.5018	121885
Endometrial cancer	rs1679014	C	T	0.9318	-0.1681	0.0289	6.38e-09	0.000277504	33.8324	121885
Endometrial cancer	rs1740828	A	G	0.4855	-0.137	0.0168	4.15e-16	0.0005453	66.4991	121885
Endometrial cancer	rs17601876	G	A	0.4849	0.1158	0.0153	3.27e-14	0.000469764	57.2832	121885
Endometrial cancer	rs2747716	G	A	0.416	-0.0983	0.0156	2.91e-10	0.000325661	39.7055	121885
Endometrial cancer	rs4733613	G	C	0.8625	-0.1548	0.0222	3.11e-12	0.000398761	48.6216	121885
Endometrial cancer	rs7981863	T	C	0.266	-0.1464	0.0173	2.7e-17	0.000587198	71.6115	121885
Endometrial cancer	rs882380	A	C	0.6086	0.0919	0.0157	4.66e-09	0.000281034	34.2629	121885
Endometrial cancer	rs937213	C	T	0.4266	0.0892	0.0153	5.07e-09	0.000278789	33.9891	121885
Breast cancer	rs10022462	T	C	0.4379	0.0375	0.0062	1.55e-09	0.00015976	36.5827	228951
Breast cancer	rs10096351	G	A	0.5441	0.1055	0.0062	1.97e-64	0.00126308	289.546	228951
Breast cancer	rs10760444	A	G	0.5667	-0.0358	0.0062	9.06e-09	0.000145605	33.341	228951
Breast cancer	rs10885405	T	C	0.46	0.0465	0.0062	5.44e-14	0.000245625	56.2495	228951
Breast cancer	rs10941679	G	A	0.2522	0.1278	0.0071	5.61e-73	0.00141315	323.997	228951
Breast cancer	rs10978911	C	G	0.1361	0.0839	0.0091	2.36e-20	0.00037114	85.0036	228951
Breast cancer	rs10995201	G	A	0.1591	-0.1317	0.0087	1.56e-51	0.000999899	229.155	228951
Breast cancer	rs11117758	A	G	0.2086	-0.0449	0.0076	3.9e-09	0.000152425	34.9029	228951
Breast cancer	rs11135046	T	G	0.5529	-0.0717	0.0062	4.68e-31	0.000583793	133.737	228951
Breast cancer	rs11205303	C	T	0.3998	0.0497	0.0064	1.14e-14	0.000263327	60.3044	228951
Breast cancer	rs1121948	G	A	0.1963	0.0575	0.0077	7.48e-14	0.000243504	55.7636	228951
Breast cancer	rs11249433	G	A	0.403	0.0988	0.0065	1.76e-52	0.00100811	231.038	228951
Breast cancer	rs11379664	AG	A	0.4376	0.2211	0.0063	1e-200	0.00535086	1231.66	228951
Breast cancer	rs11462858	GT	G	0.3215	-0.0471	0.0067	2.09e-12	0.000215802	49.4184	228951
Breast cancer	rs11583393	A	C	0.249	-0.0396	0.0072	3.61e-08	0.000132107	30.2497	228951
Breast cancer	rs11624333	C	T	0.2595	-0.0968	0.0071	6.5e-42	0.000811221	185.879	228951
Breast cancer	rs11672660	T	C	0.213	0.0472	0.008	4.13e-09	0.000152018	34.8097	228951
Breast cancer	rs11684853	T	G	0.5606	-0.0442	0.0062	1.12e-12	0.000221933	50.8227	228951
Breast cancer	rs117618124	C	T	0.0453	-0.1074	0.0156	5.46e-12	0.000206979	47.3975	228951
Breast cancer	rs117737783	A	G	0.0728	0.0747	0.0127	4.03e-09	0.000151086	34.5963	228951
Breast cancer	rs11822830	G	A	0.5959	0.0483	0.0063	1.98e-14	0.000256661	58.7773	228951
Breast cancer	rs11903787	A	G	0.2405	-0.0451	0.0076	2.36e-09	0.000153786	35.2145	228951
Breast cancer	rs11977670	A	G	0.4315	0.0522	0.0063	1.05e-16	0.000299769	68.6525	228951
Breast cancer	rs12207986	A	G	0.5362	0.0375	0.0062	1.45e-09	0.00015976	36.5827	228951
Breast cancer	rs12250948	C	T	0.7844	-0.0576	0.0074	1.04e-14	0.00026456	60.5868	228951
Breast cancer	rs1230666	G	A	0.8721	-0.0592	0.0095	3.87e-10	0.000169582	38.8322	228951
Breast cancer	rs12479355	G	A	0.2088	-0.0426	0.0076	2.36e-08	0.000137211	31.4187	228951
Breast cancer	rs12487185	G	A	0.3128	0.045	0.0066	1.21e-11	0.000203005	46.4872	228951
Breast cancer	rs12513872	A	G	0.7485	0.0413	0.0073	1.46e-08	0.000139782	32.0074	228951
Breast cancer	rs12519859	A	G	0.4748	0.0365	0.0063	5.77e-09	0.000146588	33.5661	228951
Breast cancer	rs12546444	T	A	0.1001	-0.0717	0.011	7.45e-11	0.000185537	42.4863	228951
Breast cancer	rs1268974	G	A	0.6132	-0.0793	0.0063	3.71e-36	0.000691548	158.439	228951
Breast cancer	rs12990503	G	C	0.7372	-0.073	0.007	9.99e-26	0.000474789	108.754	228951
Breast cancer	rs13066793	G	A	0.0925	-0.0685	0.0112	1.04e-09	0.000163355	37.406	228951
Breast cancer	rs13267382	G	A	0.6493	-0.0437	0.0065	1.6e-11	0.000197382	45.1994	228951
Breast cancer	rs1498608	A	T	0.0949	-0.0671	0.0107	3.48e-10	0.000171736	39.3254	228951
Breast cancer	rs1685191	T	C	0.5647	-0.0586	0.0064	3.87e-20	0.000366044	83.8362	228951
Breast cancer	rs16991615	A	G	0.0626	0.0758	0.0126	1.92e-09	0.000158047	36.1904	228951
Breast cancer	rs1707302	G	A	0.6641	0.0364	0.0066	2.95e-08	0.000132836	30.4166	228951
Breast cancer	rs170801	A	C	0.2817	-0.0591	0.007	3.17e-17	0.000311244	71.2812	228951
Breast cancer	rs17156577	C	T	0.1121	0.0578	0.0098	4.25e-09	0.000151913	34.7856	228951
Breast cancer	rs17185310	A	G	0.3034	0.0395	0.0069	8.7e-09	0.000143117	32.7712	228951
Breast cancer	rs17268829	C	T	0.2804	0.0495	0.0068	4.49e-13	0.000231393	52.9894	228951
Breast cancer	rs17426269	A	G	0.1488	0.0487	0.0086	1.74e-08	0.000140042	32.0669	228951
Breast cancer	rs1778523	G	C	0.3567	-0.0384	0.0066	7.55e-09	0.000147832	33.8509	228951
Breast cancer	rs1973765	C	T	0.4001	-0.0817	0.0064	9.71e-38	0.000711267	162.96	228951
Breast cancer	rs1985742	T	A	0.3516	0.0588	0.0065	8.1e-20	0.000357298	81.8322	228951
Breast cancer	rs2016394	A	G	0.4748	-0.0425	0.0062	6.23e-12	0.000205193	46.9884	228951
Breast cancer	rs2253012	T	C	0.4318	0.0433	0.0065	3.13e-11	0.000193786	44.3757	228951
Breast cancer	rs2403907	A	C	0.3159	-0.0796	0.0067	1.87e-32	0.000616121	141.147	228951
Breast cancer	rs2432539	G	A	0.5996	-0.0349	0.0064	4.02e-08	0.000129865	29.7363	228951
Breast cancer	rs2506889	T	C	0.3185	-0.0615	0.0067	2.38e-20	0.000367873	84.2552	228951
Breast cancer	rs2747652	C	T	0.5263	0.0663	0.0062	1.31e-26	0.000499211	114.351	228951
Breast cancer	rs2787486	C	A	0.3002	-0.0758	0.0068	5.56e-29	0.000542428	124.256	228951
Breast cancer	rs28512361	A	G	0.1127	0.0611	0.0109	2.25e-08	0.000137223	31.4214	228951
Breast cancer	rs2965183	A	G	0.3521	0.0445	0.0065	6.31e-12	0.000204674	46.8694	228951
Breast cancer	rs2992756	C	T	0.5194	-0.0506	0.0063	1.6e-15	0.000281679	64.5084	228951
Breast cancer	rs332529	A	G	0.1605	-0.0606	0.0089	9.02e-12	0.000202458	46.3619	228951
Breast cancer	rs34195518	CT	C	0.1207	0.0611	0.0096	2.01e-10	0.000176897	40.5076	228951
Breast cancer	rs35383942	T	C	0.0562	0.101	0.0139	3.79e-13	0.000230553	52.797	228951
Breast cancer	rs35910339	G	C	0.6889	0.0462	0.0067	5.41e-12	0.000207636	47.5478	228951
Breast cancer	rs35961416	CA	C	0.4117	-0.0417	0.0066	2.71e-10	0.000174328	39.9191	228951
Breast cancer	rs3769821	T	C	0.6683	-0.0565	0.0065	3.97e-18	0.000329902	75.5556	228951
Breast cancer	rs3821902	G	T	0.1358	0.0623	0.0089	2.99e-12	0.000213974	48.9996	228951
Breast cancer	rs3903072	T	G	0.4727	-0.0434	0.0062	2.25e-12	0.000213974	48.9996	228951
Breast cancer	rs4081859	A	G	0.7517	0.0521	0.0073	7.08e-13	0.000222429	50.9361	228951
Breast cancer	rs4233486	T	C	0.6514	0.0396	0.0069	9.09e-09	0.000143842	32.9373	228951
Breast cancer	rs4286946	G	C	0.1739	-0.0799	0.0083	8.63e-22	0.000404594	92.6688	228951
Breast cancer	rs4442975	T	G	0.5021	-0.1274	0.0061	1.14e-95	0.00190156	436.19	228951
Breast cancer	rs4496150	A	C	0.2466	-0.0416	0.0072	8.09e-09	0.000145786	33.3824	228951
Breast cancer	rs4562056	T	G	0.3323	0.0416	0.0067	4.72e-10	0.000168353	38.5508	228951
Breast cancer	rs4702131	C	T	0.5612	-0.0424	0.0062	1e-11	0.000204229	46.7675	228951
Breast cancer	rs4784227	T	C	0.2387	0.2153	0.0071	1e-200	0.00400026	919.534	228951
Breast cancer	rs4820318	A	G	0.3753	-0.0475	0.0064	1.03e-13	0.000240536	55.0837	228951
Breast cancer	rs4848599	C	T	0.8845	0.0933	0.01	1.58e-20	0.000380063	87.0481	228951
Breast cancer	rs4971059	A	G	0.3632	0.0424	0.0064	4.83e-11	0.000191666	43.8902	228951
Breast cancer	rs527616	G	C	0.6211	0.0499	0.0064	6.7e-15	0.00026545	60.7907	228951
Breast cancer	rs532436	A	G	0.2027	0.0431	0.0078	2.91e-08	0.000133341	30.5324	228951
Breast cancer	rs56013747	C	A	0.8273	-0.0497	0.009	3.74e-08	0.000133176	30.4947	228951
Breast cancer	rs56387622	C	T	0.1012	-0.0942	0.0106	5.47e-19	0.000344824	78.9744	228951
Breast cancer	rs56971155	T	C	0.3934	-0.0424	0.0064	3.63e-11	0.000191666	43.8902	228951
Breast cancer	rs57212245	A	G	0.0783	-0.0652	0.0119	4.09e-08	0.0001311	30.0191	228951
Breast cancer	rs58058861	A	G	0.2172	0.0474	0.0074	1.91e-10	0.000179173	41.0289	228951
Breast cancer	rs5995875	T	C	0.1068	0.1206	0.0098	9.04e-35	0.000661017	151.439	228951
Breast cancer	rs5997389	A	G	0.0903	0.0791	0.0108	2.19e-13	0.00023424	53.6416	228951
Breast cancer	rs60954078	G	A	0.07	0.1817	0.0117	2.84e-54	0.0010523	241.176	228951
Breast cancer	rs6122906	G	A	0.1816	0.0507	0.008	2.45e-10	0.000175395	40.1636	228951
Breast cancer	rs62048402	A	G	0.4156	-0.0624	0.0063	3.5e-23	0.000428311	98.1035	228951
Breast cancer	rs62331150	T	G	0.2263	0.0494	0.0074	1.85e-11	0.000194609	44.5643	228951
Breast cancer	rs62355901	C	T	0.1602	0.1734	0.0082	3.42e-98	0.00194931	447.164	228951
Breast cancer	rs62485509	T	G	0.2292	-0.0545	0.0079	4.45e-12	0.000207829	47.5921	228951
Breast cancer	rs630965	T	C	0.6196	0.0992	0.0064	3.21e-54	0.00104825	240.248	228951
Breast cancer	rs6472903	T	G	0.8261	0.0778	0.0083	4.43e-21	0.000383613	87.8616	228951
Breast cancer	rs6562760	G	A	0.766	0.0443	0.0073	1.49e-09	0.000160823	36.8263	228951
Breast cancer	rs6569648	T	C	0.7643	0.0512	0.0073	2.98e-12	0.000214812	49.1915	228951
Breast cancer	rs6596100	T	C	0.2427	-0.0439	0.0076	7.74e-09	0.000145712	33.3655	228951
Breast cancer	rs6597981	G	A	0.5178	0.0439	0.0062	1.35e-12	0.000218931	50.1351	228951
Breast cancer	rs66572733	G	C	0.037	0.095	0.0162	4.74e-09	0.000150179	34.3885	228951
Breast cancer	rs6725517	G	A	0.4088	-0.0468	0.0067	2.93e-12	0.000213062	48.7908	228951
Breast cancer	rs6787391	T	C	0.3807	0.0567	0.0064	9.07e-19	0.000342701	78.4878	228951
Breast cancer	rs68056147	A	G	0.299	0.0501	0.0069	5.36e-13	0.000230216	52.7198	228951
Breast cancer	rs6815814	C	A	0.2525	0.052	0.0072	6.13e-13	0.000227772	52.16	228951
Breast cancer	rs6882649	T	G	0.6651	0.0388	0.0066	3.67e-09	0.000150927	34.5598	228951
Breast cancer	rs7072776	G	A	0.7124	-0.0618	0.0068	1.75e-19	0.000360628	82.5953	228951
Breast cancer	rs7149262	A	C	0.2113	-0.0724	0.0076	2.47e-21	0.000396219	90.7499	228951
Breast cancer	rs71559437	A	G	0.122	-0.0686	0.0099	5.05e-12	0.000209674	48.0147	228951
Breast cancer	rs7223535	A	G	0.268	-0.0439	0.007	3.53e-10	0.000171758	39.3305	228951
Breast cancer	rs7258465	C	T	0.3436	-0.0725	0.0066	2.79e-28	0.000526765	120.666	228951
Breast cancer	rs72658071	T	A	0.0877	0.1182	0.0107	2.58e-28	0.000532713	122.029	228951
Breast cancer	rs72725173	A	G	0.1578	0.0559	0.0085	3.88e-11	0.000188869	43.2496	228951
Breast cancer	rs72755295	G	A	0.0309	0.1376	0.0179	1.65e-14	0.000258034	59.0918	228951
Breast cancer	rs73949122	G	C	0.1664	-0.0593	0.0084	1.85e-12	0.000217627	49.8364	228951
Breast cancer	rs7500067	G	A	0.2293	0.0785	0.0073	4.06e-27	0.000504814	115.635	228951
Breast cancer	rs7626742	T	G	0.5327	0.1046	0.0062	1.61e-63	0.00124165	284.627	228951
Breast cancer	rs7650602	C	T	0.4422	0.0489	0.0063	6.22e-15	0.000263075	60.2466	228951
Breast cancer	rs76956704	T	C	0.03	0.1352	0.0182	1.27e-13	0.00024097	55.1832	228951
Breast cancer	rs7697216	C	T	0.8819	0.1039	0.0098	1.61e-26	0.000490708	112.402	228951
Breast cancer	rs77528541	T	G	0.1361	-0.0583	0.0096	1.41e-09	0.000161058	36.88	228951
Breast cancer	rs77554484	A	C	0.1319	-0.0741	0.0093	1.28e-15	0.000277209	63.4844	228951
Breast cancer	rs78381082	G	A	0.172	-0.0611	0.0089	5.43e-12	0.000205812	47.1301	228951
Breast cancer	rs78425380	C	T	0.1139	0.0603	0.0099	1.03e-09	0.000162014	37.0988	228951
Breast cancer	rs78440108	T	C	0.1718	-0.0595	0.0084	1.62e-12	0.000219098	50.1732	228951
Breast cancer	rs78540526	T	C	0.0756	0.2758	0.0113	1.81e-131	0.00259514	595.7	228951
Breast cancer	rs7904249	A	G	0.1592	0.0764	0.0084	6.98e-20	0.000361184	82.7226	228951
Breast cancer	rs7971	G	A	0.3531	-0.0365	0.0065	1.93e-08	0.000137707	31.5323	228951
Breast cancer	rs8082452	G	T	0.4562	-0.0418	0.0065	1.14e-10	0.000180595	41.3544	228951
Breast cancer	rs9361840	G	A	0.2368	0.0541	0.0072	7.14e-14	0.000246536	56.458	228951
Breast cancer	rs941764	G	A	0.3429	0.0463	0.0065	8.21e-13	0.000221563	50.7378	228951
Breast cancer	rs9693444	C	A	0.6757	-0.0626	0.0066	1.6e-21	0.000392778	89.9616	228951
Breast cancer	rs9833888	T	G	0.2259	0.0457	0.0074	5.15e-10	0.000166554	38.1386	228951
Breast cancer	rs9952980	C	T	0.3504	-0.0478	0.0065	1.65e-13	0.000236148	54.0786	228951
Breast cancer	rs9954058	C	G	0.0721	-0.0891	0.0122	2.79e-13	0.000232912	53.3374	228951
ER+ breast cancer	rs10423928	A	T	0.2138	0.0557	0.0095	5.09e-09	0.000195868	34.3762	175475
ER+ breast cancer	rs10828249	A	G	0.358	0.0726	0.0077	6.72e-21	0.000506357	88.8969	175475
ER+ breast cancer	rs10896047	A	G	0.4858	-0.0493	0.0074	2.32e-11	0.000252875	44.3839	175475
ER+ breast cancer	rs10941679	G	A	0.2511	0.1563	0.0084	8.27e-78	0.00196919	346.222	175475
ER+ breast cancer	rs10978911	C	G	0.1364	0.0978	0.0107	6.6e-20	0.00047587	83.5421	175475
ER+ breast cancer	rs10995201	G	A	0.1591	-0.1379	0.0105	1.12e-39	0.000981992	172.482	175475
ER+ breast cancer	rs11117758	A	G	0.2082	-0.05	0.0091	4.06e-08	0.000172015	30.1892	175475
ER+ breast cancer	rs11133838	G	A	0.5841	-0.0415	0.0075	2.83e-08	0.000174455	30.6174	175475
ER+ breast cancer	rs11205277	G	A	0.4308	0.0562	0.0075	8.38e-14	0.000319886	56.1494	175475
ER+ breast cancer	rs11249433	G	A	0.4029	0.123	0.0077	4.73e-58	0.00145205	255.167	175475
ER+ breast cancer	rs11624164	T	C	0.2552	-0.1037	0.0086	1.38e-33	0.000827915	145.397	175475
ER+ breast cancer	rs11822830	G	A	0.5961	0.0445	0.0075	3.33e-09	0.000200583	35.204	175475
ER+ breast cancer	rs12110303	T	G	0.16	-0.074	0.0107	4.8e-12	0.000272497	47.829	175475
ER+ breast cancer	rs12481286	T	G	0.2405	0.0507	0.0091	2.79e-08	0.000176865	31.0405	175475
ER+ breast cancer	rs12550713	G	C	0.3991	0.1093	0.0075	2.99e-48	0.00120886	212.38	175475
ER+ breast cancer	rs12703654	A	C	0.4491	0.0587	0.0077	3.1e-14	0.000331082	58.1152	175475
ER+ breast cancer	rs12711947	C	T	0.8983	0.0864	0.0124	3.41e-12	0.000276598	48.5489	175475
ER+ breast cancer	rs12769650	A	G	0.1276	0.0746	0.011	1.1e-11	0.000262037	45.9925	175475
ER+ breast cancer	rs13267382	G	A	0.6478	-0.0427	0.0077	2.93e-08	0.00017522	30.7517	175475
ER+ breast cancer	rs1361549	A	G	0.4191	-0.0451	0.0075	1.56e-09	0.000206028	36.1598	175475
ER+ breast cancer	rs143048713	GGT	G	0.104	-0.0999	0.0126	2.45e-15	0.000358112	62.8615	175475
ER+ breast cancer	rs1432679	T	C	0.5669	-0.0695	0.0074	5.77e-21	0.000502427	88.2066	175475
ER+ breast cancer	rs151090251	GGACTTCTGTAGAGA	G	0.0523	0.0976	0.0177	3.2e-08	0.000173246	30.4052	175475
ER+ breast cancer	rs151309152	A	C	0.0275	0.1492	0.0224	2.98e-11	0.000252765	44.3646	175475
ER+ breast cancer	rs1685191	T	C	0.5677	-0.0635	0.0077	1.52e-16	0.00038742	68.0082	175475
ER+ breast cancer	rs16857609	T	C	0.2621	0.0721	0.0083	3.43e-18	0.000429845	75.4587	175475
ER+ breast cancer	rs16867692	G	A	0.197	0.0576	0.0096	2.1e-09	0.000205115	35.9996	175475
ER+ breast cancer	rs17035305	A	C	0.3146	-0.0436	0.0079	4.15e-08	0.000173551	30.4589	175475
ER+ breast cancer	rs1707302	G	A	0.664	0.0466	0.0078	2.75e-09	0.000203366	35.6926	175475
ER+ breast cancer	rs170801	A	C	0.2812	-0.0794	0.0084	2.99e-21	0.000508916	89.3465	175475
ER+ breast cancer	rs17268829	C	T	0.2796	0.0517	0.0082	2.4e-10	0.000226485	39.751	175475
ER+ breast cancer	rs17426269	A	G	0.1488	0.0576	0.0103	1.88e-08	0.000178188	31.2727	175475
ER+ breast cancer	rs17617028	A	G	0.2265	0.0569	0.0087	7.64e-11	0.000243705	42.7741	175475
ER+ breast cancer	rs17838698	T	C	0.2978	0.0624	0.008	5.78e-15	0.000346596	60.8393	175475
ER+ breast cancer	rs1812715	G	A	0.6943	0.0908	0.0081	2.66e-29	0.000715609	125.66	175475
ER+ breast cancer	rs200539634	C	CT	0.8684	-0.0709	0.0115	6.52e-10	0.000216565	38.0095	175475
ER+ breast cancer	rs2009607	T	A	0.0453	0.1165	0.0202	8.47e-09	0.000189518	33.2617	175475
ER+ breast cancer	rs2016394	A	G	0.4753	-0.0603	0.0074	3.22e-16	0.000378261	66.3997	175475
ER+ breast cancer	rs2253012	T	C	0.432	0.0511	0.0078	5.19e-11	0.000244529	42.9188	175475
ER+ breast cancer	rs2461201	T	C	0.3483	0.0473	0.0078	1.67e-09	0.000209521	36.7729	175475
ER+ breast cancer	rs28649231	A	G	0.1907	0.0651	0.0095	8.8e-12	0.000267537	46.958	175475
ER+ breast cancer	rs2957449	C	T	0.5331	0.0475	0.0076	5.24e-10	0.000222561	39.0621	175475
ER+ breast cancer	rs2992756	C	T	0.5202	-0.0608	0.0076	9.93e-16	0.000364591	63.9993	175475
ER+ breast cancer	rs310302	A	G	0.4023	0.0444	0.0075	3.63e-09	0.000199683	35.046	175475
ER+ breast cancer	rs35054111	T	TA	0.3629	-0.046	0.0083	2.95e-08	0.000175012	30.7153	175475
ER+ breast cancer	rs35273427	C	T	0.0599	0.0937	0.016	4.87e-09	0.000195407	34.2953	175475
ER+ breast cancer	rs35383942	T	C	0.0561	0.0918	0.0164	2.33e-08	0.000178527	31.3323	175475
ER+ breast cancer	rs3769821	T	C	0.6678	-0.0545	0.0078	2.09e-12	0.000278143	48.8201	175475
ER+ breast cancer	rs3821902	G	T	0.1357	0.0589	0.0106	3.18e-08	0.000175925	30.8755	175475
ER+ breast cancer	rs4286946	G	C	0.1742	-0.0748	0.0099	4.91e-14	0.000325219	57.0858	175475
ER+ breast cancer	rs4361315	A	G	0.7316	-0.0547	0.0087	2.59e-10	0.000225228	39.5304	175475
ER+ breast cancer	rs4442975	T	G	0.5018	-0.1482	0.0073	6.65e-91	0.00234324	412.141	175475
ER+ breast cancer	rs4703870	A	G	0.7537	0.0613	0.0088	3.32e-12	0.000276452	48.5233	175475
ER+ breast cancer	rs4784227	T	C	0.2385	0.2296	0.0084	3.93e-164	0.0042396	747.103	175475
ER+ breast cancer	rs4820318	A	G	0.3749	-0.0632	0.0076	1.1e-16	0.000393931	69.1516	175475
ER+ breast cancer	rs4894562	A	G	0.2171	0.0519	0.0089	4.57e-09	0.000193756	34.0055	175475
ER+ breast cancer	rs490706	A	G	0.5247	0.1148	0.0074	3.28e-54	0.00136965	240.666	175475
ER+ breast cancer	rs4971059	A	G	0.3636	0.0519	0.0077	1.27e-11	0.000258837	45.4306	175475
ER+ breast cancer	rs4980029	G	A	0.163	0.0759	0.0098	1.24e-14	0.000341718	59.9828	175475
ER+ breast cancer	rs527616	G	C	0.6202	0.0515	0.0076	1.37e-11	0.000261612	45.9179	175475
ER+ breast cancer	rs56083805	C	T	0.2422	-0.0595	0.0091	7e-11	0.000243574	42.751	175475
ER+ breast cancer	rs5997389	A	G	0.0901	0.0882	0.0128	6.23e-12	0.000270511	47.4802	175475
ER+ breast cancer	rs6062356	G	T	0.1493	0.0564	0.0103	4.13e-08	0.000170842	29.9833	175475
ER+ breast cancer	rs60954078	G	A	0.0701	0.1392	0.014	2.21e-23	0.00056307	98.8593	175475
ER+ breast cancer	rs61988429	T	C	0.2425	-0.0486	0.0087	2.52e-08	0.000177804	31.2054	175475
ER+ breast cancer	rs62048402	A	G	0.4164	-0.0593	0.0075	2.16e-15	0.000356137	62.5147	175475
ER+ breast cancer	rs62247166	T	C	0.475	-0.0406	0.0074	3.92e-08	0.000171514	30.1012	175475
ER+ breast cancer	rs62355902	T	A	0.1587	0.2032	0.0098	2.88e-96	0.00244409	429.923	175475
ER+ breast cancer	rs62485509	T	G	0.2289	-0.053	0.0094	1.6e-08	0.000181135	31.79	175475
ER+ breast cancer	rs6472903	T	G	0.8265	0.0784	0.0099	2.01e-15	0.000357266	62.7129	175475
ER+ breast cancer	rs6762558	G	A	0.3868	0.0618	0.0076	3.18e-16	0.000376679	66.1218	175475
ER+ breast cancer	rs6815814	C	A	0.2543	0.055	0.0086	1.59e-10	0.00023303	40.9	175475
ER+ breast cancer	rs6904031	T	A	0.0647	0.1107	0.0148	6.67e-14	0.000318726	55.9457	175475
ER+ breast cancer	rs7017073	C	T	0.2114	0.0628	0.0089	1.77e-12	0.000283662	49.7891	175475
ER+ breast cancer	rs7149262	A	C	0.2113	-0.0804	0.0091	1.45e-18	0.000444653	78.0592	175475
ER+ breast cancer	rs7153397	T	C	0.6952	0.0536	0.0081	3.36e-11	0.00024948	43.7879	175475
ER+ breast cancer	rs71559437	A	G	0.1214	-0.0794	0.0119	2.79e-11	0.000253642	44.5187	175475
ER+ breast cancer	rs7223535	A	G	0.268	-0.0463	0.0084	3.2e-08	0.000173106	30.3807	175475
ER+ breast cancer	rs72658071	T	A	0.0873	0.1187	0.0128	1.37e-20	0.000489839	85.9957	175475
ER+ breast cancer	rs72755295	G	A	0.0311	0.1481	0.0208	1.08e-12	0.00028883	50.6966	175475
ER+ breast cancer	rs7280197	C	T	0.3778	0.0461	0.0082	1.7e-08	0.000180086	31.606	175475
ER+ breast cancer	rs73169065	T	A	0.1073	0.1108	0.0117	2.04e-21	0.000510823	89.6815	175475
ER+ breast cancer	rs7463114	C	T	0.6757	-0.0684	0.0078	2.44e-18	0.000438044	76.8985	175475
ER+ breast cancer	rs7500067	G	A	0.2301	0.0819	0.0086	2.26e-21	0.000516572	90.6914	175475
ER+ breast cancer	rs7650602	C	T	0.4421	0.0571	0.0075	2.27e-14	0.000330211	57.9622	175475
ER+ breast cancer	rs7697216	C	T	0.882	0.1338	0.0118	6.06e-30	0.000732175	128.571	175475
ER+ breast cancer	rs7729559	T	C	0.2217	0.057	0.0088	9.31e-11	0.000239037	41.9546	175475
ER+ breast cancer	rs78029804	T	C	0.134	-0.076	0.011	4.57e-12	0.000271962	47.735	175475
ER+ breast cancer	rs78540526	T	C	0.0759	0.3277	0.0132	1.02e-136	0.00349999	616.311	175475
ER+ breast cancer	rs7862747	A	C	0.6224	0.1237	0.0077	3.36e-58	0.0014686	258.079	175475
ER+ breast cancer	rs8105994	C	T	0.3454	-0.0768	0.0078	8.65e-23	0.000552177	96.9456	175475
ER+ breast cancer	rs811458	C	T	0.6879	0.0511	0.008	1.72e-10	0.000232459	40.7997	175475
ER+ breast cancer	rs9421410	A	G	0.3274	-0.0599	0.008	6.03e-14	0.000319389	56.062	175475
ER+ breast cancer	rs946008	T	C	0.495	-0.0861	0.0077	8.91e-29	0.000712033	125.032	175475
ER+ breast cancer	rs9952980	C	T	0.3499	-0.0549	0.0078	1.48e-12	0.000282239	49.5394	175475
ER+ breast cancer	rs9954058	C	G	0.0718	-0.1057	0.0147	6.06e-13	0.000294559	51.7024	175475
ER- breast cancer	rs10069690	T	C	0.2601	0.1613	0.013	1.54e-35	0.00120655	153.948	127442
ER- breast cancer	rs10096351	G	A	0.5455	0.07	0.0114	7.14e-10	0.000295764	37.7033	127442
ER- breast cancer	rs10179592	C	T	0.8991	0.1156	0.0193	2.3e-09	0.000281427	35.8752	127442
ER- breast cancer	rs10885405	T	C	0.4613	0.0716	0.0113	2e-10	0.000314934	40.1479	127442
ER- breast cancer	rs10995201	G	A	0.1582	-0.0963	0.0159	1.57e-09	0.000287754	36.6819	127442
ER- breast cancer	rs11076805	A	C	0.2543	-0.0782	0.014	2.15e-08	0.000244759	31.1997	127442
ER- breast cancer	rs12129456	G	T	0.4095	-0.0835	0.0118	1.41e-12	0.000392759	50.0728	127442
ER- breast cancer	rs12472404	C	G	0.2316	-0.0879	0.0137	1.24e-10	0.000322912	41.1652	127442
ER- breast cancer	rs12990503	G	C	0.7368	-0.0734	0.0126	6.48e-09	0.000266209	33.9347	127442
ER- breast cancer	rs1432679	T	C	0.5656	-0.073	0.0113	1.05e-10	0.000327366	41.7332	127442
ER- breast cancer	rs17828955	C	T	0.2649	-0.0797	0.013	7.76e-10	0.000294842	37.5857	127442
ER- breast cancer	rs183438976	T	C	0.0997	0.1285	0.0186	4.51e-12	0.000374374	47.728	127442
ER- breast cancer	rs189268208	G	A	0.0858	0.1116	0.0196	1.32e-08	0.000254327	32.4197	127442
ER- breast cancer	rs199504893	C	CA	0.5874	0.066	0.0118	2.51e-08	0.000245417	31.2836	127442
ER- breast cancer	rs2169137	C	G	0.7396	-0.128	0.0128	1.42e-23	0.000784055	99.9984	127442
ER- breast cancer	rs2263146	T	C	0.3504	0.0797	0.0118	1.2e-11	0.000357836	45.619	127442
ER- breast cancer	rs2731830	A	G	0.9644	-0.2345	0.0419	2.25e-08	0.000245719	31.3221	127442
ER- breast cancer	rs2747652	C	T	0.526	0.0991	0.0113	1.93e-18	0.000603137	76.9101	127442
ER- breast cancer	rs34810249	C	T	0.2438	0.0804	0.0138	5.43e-09	0.000266272	33.9428	127442
ER- breast cancer	rs3769823	G	A	0.7071	-0.0684	0.0121	1.76e-08	0.00025068	31.9547	127442
ER- breast cancer	rs4528762	C	A	0.2646	-0.1213	0.0147	1.92e-16	0.000534001	68.0895	127442
ER- breast cancer	rs4784227	T	C	0.2403	0.1368	0.0128	1.72e-26	0.000895469	114.221	127442
ER- breast cancer	rs56069439	A	C	0.2971	0.155	0.0121	1.25e-37	0.00128594	164.091	127442
ER- breast cancer	rs56309329	T	A	0.2368	0.0734	0.0131	2.1e-08	0.00024628	31.3937	127442
ER- breast cancer	rs56687477	A	G	0.1577	-0.1114	0.016	3.19e-12	0.000380236	48.4756	127442
ER- breast cancer	rs616402	T	C	0.307	-0.1172	0.0124	2.65e-21	0.000700479	89.3316	127442
ER- breast cancer	rs6569648	T	C	0.7651	0.0741	0.0135	4.26e-08	0.000236349	30.1274	127442
ER- breast cancer	rs6725517	G	A	0.4065	-0.0683	0.0122	1.98e-08	0.000245868	31.3412	127442
ER- breast cancer	rs76956704	T	C	0.03	0.2193	0.0325	1.49e-11	0.000357144	45.5306	127442
ER- breast cancer	rs7710996	G	A	0.7729	-0.0773	0.0132	5.19e-09	0.000269018	34.2929	127442
ER- breast cancer	rs9397437	A	G	0.0682	0.2733	0.0206	2.76e-40	0.00137922	176.01	127442
R2 refers to the proportion of variance explained for the association between the SNPs and the exposure variable. The calculation formula is R2 = 2*β2*EAF*(1-EAF)/(2*β2*EAF*(1-EAF) + 2*SE2*N*EAF*(1-EAF))
F refers to the F-statistic. The calculation formula is F = R2*(N-2)/(1-R2), where F < 10 indicated a weak instrument variant.
N refers to the sample size of the initial GWAS from which the genetic variants were selected.
Abbreviations: SNPs: single nucleotide polymorphisms; EA: effect allele; OA, other allele; EAF: effect allele frequency; SE: standard error.

## Sheet: Sheet S2
Sheet S2:Estimation of power for Mendelian randomization analyses for outcome based on total sample size and proportion of phenotypic variance of exposure explained by instruments.
Exposure	Outcome	N	Type-I error rate	Proportion of cases	Proportion of exposure variance explained by instruments (R2)	Power to detect true OR per 1-SD deviation of the exposure variable
						OR > 1.1	OR > 1.2	OR > 1.4
Endometrial cancer	Breast cancer	122977	0.05	0.537132	0.004871	0.21	0.6	0.98
Endometrial cancer	ER+ breast cancer	69501	0.05	0.396074	0.004871	0.14	0.39	0.89
Endometrial cancer	ER- breast cancer	21468	0.05	0.168453	0.004871	0.07	0.12	0.31
Breast cancer	Endometrial cancer	12906	0.05	0.105887	0.054857	0.13	0.36	0.89
ER+ breast cancer	Endometrial cancer	12906	0.05	0.105887	0.047497	0.12	0.32	0.84
ER- breast cancer	Endometrial cancer	12906	0.05	0.105887	0.014147	0.07	0.13	0.36
Abbreviations: N, number of cases in outcome dataset; OR, odds ratio; SD, standard deviation; ER, Estrogen receptor

## Sheet: Sheet S3
Sheet S3: Summary result of the MR Steiger in locus-wide significance level.
Exposure	Outcome	Correct causal direction	P value
Endometrial cancer	Breast cancer	TRUE	4.78e-56
Endometrial cancer	ER+ breast cancer	TRUE	3.49e-52
Endometrial cancer	ER- breast cancer	TRUE	1.78e-39
Breast cancer	Endometrial cancer	TRUE	0
ER+ breast cancer	Endometrial cancer	TRUE	0
ER- breast cancer	Endometrial cancer	TRUE	1.33e-138
